RESEARCH ARTICLE

# Death in Community Australian Football: A Ten Year National Insurance Claims Report

Lauren V. Fortington\*, Caroline F. Finch

Australian Collaboration for Research into Injury in Sport and its Prevention (ACRISP), Federation University Australia, PO Box 668, Ballarat, 3353, Victoria, Australia

\* [l.fortington@federation.edu.au](mailto:l.fortington@federation.edu.au)

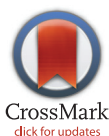

OPEN ACCESS

**Citation:** Fortington LV, Finch CF (2016) Death in Community Australian Football: A Ten Year National Insurance Claims Report. PLoS ONE 11(7): e0159008. doi:10.1371/journal.pone.0159008

**Editor:** David J. Handelsman, University of Sydney, AUSTRALIA

**Received:** April 18, 2016

**Accepted:** June 25, 2016

**Published:** July 28, 2016

**Copyright:** © 2016 Fortington, Finch. This is an open access article distributed under the terms of the [Creative Commons Attribution License](https://creativecommons.org/licenses/by/4.0/), which permits unrestricted use, distribution, and reproduction in any medium, provided the original author and source are credited.

**Data Availability Statement:** Data were provided by JLT Sport to the researchers as part of an agreement between the researchers, JLT Sport, the AFL and other partners involved in a multiagency injury prevention project (protocol paper available at <http://injuryprevention.bmj.com/content/17/3/1.full>). Contact details for JLT Sport are available on their website <https://afi.jltsport.com.au/community.aspx>.

**Funding:** Caroline Finch is funded by a National Health and Medical Research Council (NHMRC) Principal Research Fellowship (ID1058737).

**Competing Interests:** The authors have declared that no competing interests exist.

## Abstract

While deaths are thought to be rare in community Australian sport, there is no systematic reporting so the frequency and leading causes of death is unknown. The aim of this study was to describe the frequency and cause of deaths associated with community-level Australian Football (AF), based on insurance-claims records. Retrospective review of prospectively collected insurance-claims for death in relation to community-level AF activities Australia-wide from 2004 to 2013. Eligible participants were aged 15+ years, involved in an Australian football club as players, coaches, umpires or supporting roles. Details were extracted for: year of death, level of play, age, sex, anatomical location of injury, and a descriptive narrative of the event. Descriptive data are presented for frequency of cases by subgroups. From 26,749 insurance-claims relating to AF, 31 cases were in relation to a death. All fatalities were in males. The initial event occurred during on-field activities of players (football matches or training) in 16 cases. The remainder occurred to people outside of on-field football activity (n = 8), or non-players (n = 7). Road trauma (n = 8) and cardiac conditions (n = 7) were the leading identifiable causes, with unconfirmed and other causes (including collapsed or not yet determined) comprising 16 cases. Although rare, fatalities do occur in community AF to both players and people in supporting roles, averaging 3 per year in this setting alone. A systematic, comprehensive approach to data collection is urgently required to better understand the risk and causes of death in participants of AF and other sports.

## Background

A physically active lifestyle associated with sport and recreation activities is strongly encouraged for its positive health benefits. Despite the efforts of governments, health professionals and sports bodies toward risk management and creating safe sporting environments, injury and illness do occur, including those that result in death. In a sports setting, death can be classified as being directly or indirectly related to sports activity. Fatalities that are directly related to sport result during actual sport participation or execution of the fundamental skills of the sport. Indirect fatalities comprise underlying systemic failures or existing disease that occur during participation or are in some way exacerbated through the player's participation, usually

**Abbreviations:** AF, Australian Football; AFNRPP, Australian Football National Risk Protection Program; JLT, Jardine Lloyd Thompson; SCD, Sudden cardiac death; VSTR, Victorian State Trauma Registry; NCIS, National Coroners' Information System.

being cardiac or respiratory in nature.[1] Sporting teams and clubs can also be impacted when a death is unrelated to direct participation in the sport but is instead linked to a club supporting role (coach, trainer), social event or during travel to and from club activities.[2] Understanding the leading causes of deaths in different sporting environments is an important step towards providing appropriate emergency management plans and the possible prevention of fatalities.[3]

Australian football (AF) is played nationwide in Australia by over 1.2 million male and female participants of all ages, and many more people taking part through support roles including umpiring, coaching and management.[4] The benefits of being an active member of an AF club, whether as a player, coach, official or volunteer, are associated with positive health outcomes, as well as strong interpersonal relationships between members and economic/social advantages brought to local communities.[5] While deaths are generally thought to be rare in the setting of community AF, and indeed most other sports, there is no currently no systematic reporting of deaths in any Australian sport so the frequency and leading causes are unknown.

Insurance claims have been proposed as a valuable data source for injury surveillance in sport owing to the ongoing and systematic approach to data collection by the companies who provide insurance coverage.[6, 7] By their nature, insurance data tends to capture injuries at the most severe end of the injury spectrum, particularly those requiring medical treatment or impacting an individual financially. This coverage makes insurance data a potentially good source for claims relating to deaths as participants' next of kin may be likely to seek compensation to help manage any medical/support costs.

The aim of this paper is to report the number and cause of deaths relating to community-level AF in Australia that were reported to a nationwide AF insurance agency, over a ten year period from 2004–2013. This is important because, with an understanding of the number of fatality events that occur and the leading causes of these events, key areas of interest can be identified and measures for prevention developed and monitored.

## Methods

The Federation University Human Research Ethics Committee provided approval for investigation of the de-identified data extracted for this study (E13-016).

This study is a review of prospectively collected data from the Australian Football National Risk Protection Program (AFNRPP). The AFNRPP provides personal accident cover (including injury and death) through the insurance agency JLT (Jardine Lloyd Thompson) Sport to all registered community AF club members.[8] The 'insured' is represented by the association/leagues in which clubs participate, with over 260 leagues consistently since 2004. The 'insured persons' includes all players, officials, volunteers, trainers, runners, club and league appointed umpires, coaches, directors, officers, committees, sub-committees, regional boards and work experience students. The number of insured persons would expect to vary substantially at each club, with no specific numbers available.

The policy reimburses a portion of non-Medicare (standard national government coverage) medical costs and in some cases (those with an extended policy), loss of income for up to 12 months. All football-related events and activities are covered; this means claimants do not necessarily have to be playing football (games/training) at the time of the injury/death and the injury/death data is not only reported for players. Claims are submitted up to 180 days from the date of a claimable event by the player, club or next of kin.

All claims for injury (including death) are reported via a standardised insurance claim form.[8] The form is completed by the claimant, the football club president and a medical practitioner. Data from this form is subsequently entered into the insurer's database by an administrator.

For this study, insurance claims with the nature of injury reported as 'death' were extracted. Details extracted for all cases included: injury year, level of play (i.e. senior or junior league), activity at time of event (playing, training, travelling, coaching, etc), age, sex, and a text narrative description of the event. Using the text narrative description, a cause was identified where available (as cardiac-related, road trauma, unconfirmed or other). A conservative approach was taken so all cases that did not have a clearly reported diagnosis were labelled as unconfirmed. Data were included from 1 January 2004 to 31 December 2013, inclusive.

A descriptive analysis is presented with the frequency of cases reported in different sub-groups. To ensure the privacy of individual player data reported, details are not reported for categories with fewer than five cases. For this reason, all data are reported across the entire period and analysis of time trends was not possible. Incidence rates of death by club-participation estimates were calculated for players (number of player-related deaths divided by all participants over the ten year period,) with a 95% confidence interval (95% CI). Participation data were extracted for club participation from the AFL Annual Reports published online for 2006–2013.[9] As no equivalent data were identified for 2004 or 2005, participation numbers from 2006 were substituted. This may have led to a slight overestimate of club participation numbers in these years as there was annual growth in overall participation (inclusive of total numbers, schools, other competitions) for each successive year. Club participation numbers include youth and adult ages. While the majority are male club participants, there is a small, but growing, proportion of females which will have impacted on increased numbers in later years (i.e. particularly since 2010). As only players were included in the denominator (not people in other roles), we correspondingly limited the numerator (number of deaths) to players only. Analyses were performed using Microsoft Excel and [OpenEpi.com](http://OpenEpi.com).

## Results

From a total of 26,749 AF-related injury claims to the AFNRPP, 31 cases were for death. This represents an average of 3 deaths per year over the ten year period.

All cases were males, with the majority occurring on-field in football matches/training (n = 18). Most claims were for players (n = 24), mainly during football matches/training (n = 16). Five cases involved players aged 15–17 years, the remainder of cases were aged 18+ years (n = 26). Seven claims were for people in other football roles (non-player roles).

Cause was identified as road trauma (n = 8), cardiac (n = 7) and unconfirmed/other (n = 16) ([Table 1](#)). Of the other/unconfirmed cases, n = 8 had a descriptive narrative which included 'collapsed,' n = 5 had no indication of what occurred (i.e. narrative essentially stated simply 'death') and n = 3 had a cause that could be confirmed from the narrative as not being linked to cardiac or road trauma (but reason not disclosed due to privacy.) Of the road trauma, no cases involved multiple fatalities (i.e. one player died in each event.)

The incidence rate of death was estimated for the 24 players, over a total participation number of 2,965,122 players from 2004–2013. The incidence rate for player-deaths was 0.8/100,000 club-participants (95%CI: 0.5; 1.2)

## Discussion

Reporting deaths in sport is an important starting point toward improved emergency management and safety for players. In the United States, a long history of catastrophic event data collection has demonstrated positive impacts for participants through rule changes, equipment modifications and emergency service awareness/preparedness.[1, 10] This is the first study to report all-cause deaths from Australia-wide insurance claims in any sport in Australia. The data confirms that while deaths in community AF settings are rare, they do occur, with the

**Table 1. Details of 31 cases of death relating to community level Australian Football club players, support staff and volunteers from 2004–2013 reported to a nationwide insurance agent.**

|                                                                     | n         | %  |
|---------------------------------------------------------------------|-----------|----|
| <b>Who/activity</b>                                                 |           |    |
| Player participating in football match or training                  | 16        | 52 |
| Player involved in other/unknown activity (travel, social activity) | 8         | 26 |
| People in non-player roles                                          | 7         | 23 |
| <b>Cause</b>                                                        |           |    |
| Road trauma                                                         | 8         | 26 |
| Cardiac                                                             | 7         | 23 |
| Unknown/other <sup>a</sup>                                          | 16        | 52 |
| <b>Location<sup>b</sup></b>                                         |           |    |
| Initial event occurred on-field                                     | 18        | 58 |
| Initial event occurred off-field                                    | 10        | 32 |
| Unknown                                                             | 3         | 10 |
| <b>Total</b>                                                        | <b>31</b> |    |

<sup>a</sup>a number of cases listed as ‘collapsed’ or similar in the descriptive narrative and were referred to the coroner

<sup>b</sup> location of the initial event that led to death, person may have subsequently died in hospital

doi:10.1371/journal.pone.0159008.t001

average number of deaths occurring at 3 per year nationally. Half of the fatalities were in players from initial incidents occurring on the football field. The limitations in the data support the need for a systematic approach to data collection, following a best practice process [11], to better understand why these events occur.

Key issues relating to both on-field (cardiac and unknown/other causes) and off-field deaths are discussed below in relation to previous studies in AF and other sports.

### On-field deaths

The only category for on-field incidents leading to death that could be identified from the data was ‘cardiac-related’. The large number of cases that could only be assigned to ‘unconfirmed/other’ as cause, but with descriptions of ‘collapsed’ in the text narratives, suggest the data are likely to underestimate the number of cardiac-related deaths. Sudden cardiac death (SCD) is known to be a leading cause of death in sporting participants generally,[12, 13] and specifically from results in previous AF-research.[14–16] A substantial body of research into SCD exists, particularly in understanding the underlying causes into why/how SCD occurs in sporting populations,[17] preventing SCD in athletes through screening[18–20] as well as the acute management of cardiac arrest in sports settings.[21] This focus on prevention and management is underpinned by data from studies conducted mainly in the United States and Europe.[22–24] The rates presented within those studies vary substantially owing to the type of data collection (e.g. prospective, retrospective), source of data (e.g. media, death certificates), study setting (e.g. general population, military-only) and the population included (e.g. all ages, children-only). There are no similar publications from a broad Australian sports perspective to identify the number of cases of cardiac-related deaths in sport.[25] One Australian report of data from an annual community running event identified nine cases of SCD in 25 years of the event’s history [26] and a second study reported on 14 cases of sudden death in AF using coronial data for one state (Victoria)[16]. Some of the factors that have been identified as increasing the risk of SCD add further support to the need to collect and report the number of cases of SCD for

Australian sports participants specifically. As an example, research from the USA has identified higher risks of SCD in the college setting for males, African-Americans and basketball players. [27] Strong genetic links, in combination with different sports participation behaviours and health services in Australia, would suggest a different incidence and risk for such events is likely. Certainly there is a possibility for an increased risk of SCD in sport for Indigenous Australians. [15] With current support for the acute management of SCD being promoted through the recommendation and delivery of automated external defibrillators in Australia, [28, 29] establishing routine collection of SCD data would provide important information to evaluate the impact of newly introduced treatment/management initiatives on reducing fatalities from sports-related sudden cardiac arrest.

Our study reported no identifiable sport participation related injury deaths (e.g. from a hit causing damage to brain / internal organ as has been reported in other sports [1]). However, previous research has reported injuries as a cause of death specific to AF, with two in-hospital injury-related deaths between 2011–2012 due to incidents whilst playing AF identified in a larger investigation of all national sports related hospitalisations. [30] No details on the cause of these deaths was reported. Possible reasons for why these injury-related deaths were not identified in our study (despite overlap in the study time frames) include: they were in our unconfirmed/other group of causes because of the lack of detail in the descriptive narrative; they were not covered by insurance or the next of kin did not file an insurance claim; or they were participating in AF activities outside of a registered club setting that were not covered by insurance.

Injury deaths in Australian sport have also previously been investigated using data from the Victorian State Trauma Registry (VSTR) and the National Coroners' Information System (NCIS) from 1 July 2001–30 June 2007 in the state of Victoria. [31, 32] In those studies (which partly covered overlapping time periods as our data), no injury deaths were reported for AF. [31, 32] However, injury-deaths for AF from those data sources may also be underestimated due to the way that data are collected and coded. The VSTR includes information from all patients admitted to state trauma system health services (public and private) in Victoria, and the NCIS is a national, centralised database of coronial information and includes information on all cases of unexpected death, irrespective of the cause. For hospital datasets, coded to the International Classification for Diseases, the 'activity at time of event' may be missing, or coded as an 'unspecified activity' in which AF-related cases cannot be identified. [33–35] Large numbers of 'unidentified' [33, 34] or 'other specified activity' [35] cases have been reported in sports injury studies more broadly and it has been estimated that up to 20% of sports injuries may not be identifiable in hospital data collection due to under-coding of activity. [33] Therefore, it appears that to obtain data relating to on-field injury deaths direct capture through dedicated sports injury surveillance is required.

Aside from the direct-injuries previously explored in AF-research, [30–32] there are also additional causes of death that may have contributed to the unconfirmed/other cases of on-field deaths. Based on leading causes of sports-related deaths in the US, it might be expected to identify cases of injury (particular to the brain or spinal cord), heat-stroke or asthma. [3] However, without more detailed data on the cause of death, it is currently not possible to ascertain what these other causes may be in specific relation to AF or to identify the management and prevention measures that might be used to counter these incidents. Certainly, there is cause to call for more coordinated efforts toward reporting this information.

## Off-field deaths

Although more than half of the cases occurred during an on-field incident, the leading single identifiable cause of death in this study was road trauma, involving motor vehicle or bicycle

crashes. Other studies have also reported high proportions of road traffic deaths in athlete groups.[2, 36] This finding likely reflects broader population figures, with males aged 18–40 years having relatively large representation in both football/sport participation and road trauma cases.[37, 38] Although not related to participation in the sport directly, these road traffic deaths suggest a possible avenue for road safety messages to be communicated through sports clubs/teams to reach (a part of) their intended target group.

## Limitations

This is the first study in Australia to report insurance data claims for deaths occurring in a sporting context, with this insurance data adding important new findings to previous literature. However, there are limitations associated with the insurance data presented, which is still likely to underestimate AF-related deaths. A major reason for this underestimate is that filing an insurance claim is restricted to registered members of community clubs. Not everyone who is injured or has a cardiac event will lodge an insurance claim even when they are entitled to do so. A cause of death was unable to be ascertained from the insurance claim record in over half of the cases, severely limiting our ability to identify the most relevant measures for prevention. Understanding and determining the mechanism of death in AF relies on rich descriptive text of the incident within the database. For example, a large number of deaths were described as ‘collapsed’ with no underlying or exact cause of the collapse reported. All cases of sudden death of unknown origin are referred to a coroner for investigation and diagnosis, a process that can extend over a length period (i.e. many months). However, insurance claims must be lodged within 180 days, and at this time, coronial enquiries may not yet have been resolved. As such, when initiating a claim, many will not have a cause of death, as was the situation with around half of the cases in the current study. This presents a major limitation of using insurance data for routine surveillance of death in sport, unless processes to update the cause of death when known can be put in place.

## Conclusions

The current data and previous published literature on AF fatalities appears discrepant in the numbers and types of cases captured, and likely underestimates all causes of death, both on-field and off-field. Based on available current sources, it is recommended that when reporting sporting-related deaths in Australia that multiple sources of information be used. A common identifier (e.g. date of death combined with the sport) would be needed to identify incident cases and ensure no duplication of reporting.

Many sport-related deaths in Australia are potentially preventable but specific details on the events surrounding them are first required to better understand why they occurred. With an average of three fatalities per year reported for insurance claims from within community AF only, preventable fatalities need to be identified. The results of this study provide support for a systematic, comprehensive approach to data collection, to better understand the number and causes of death, not only in AF but in all sports.

## Acknowledgments

We thank JLT Sport for providing the insurance data for this work and Dr Corey Joseph for his earlier work on the database. Caroline Finch is funded by a National Health and Medical Research Council (NHMRC) Principal Research Fellowship (ID1058737). ACRISP is one of the International Research Centres for the Prevention of Injury and Protection of Athlete Health supported by the International Olympic Committee (IOC). JLT provided data to



ACRISP as part of its contribution to the NHMRC funded NoGAPS Partnership Project (ID: 565097).

## Author Contributions

Conceived and designed the experiments: CFF. Analyzed the data: LVF CFF. Wrote the paper: LVF CFF.

## References

1. Kucera K, Yau R, Cox Thomas L, Wolff C, Cantu RC. Catastrophic sports injury research—thirty second annual report. Available at: [https://nccsir.unc.edu/files/2013/10/NCCSIR-32nd-Annual-All-Sport-Report-1982\\_2014.pdf](https://nccsir.unc.edu/files/2013/10/NCCSIR-32nd-Annual-All-Sport-Report-1982_2014.pdf) accessed 02 March 2016: The National Center for Catastrophic Sport Injury Research, 2015.
2. Asif I, Harmon KG, Klossner D. Motor vehicle accidents: the leading cause of death in collegiate athletes. *Clin J Sport Med.* 2013; 23(6):439–43. doi: [10.1097/JSM.0b013e31829610cc](https://doi.org/10.1097/JSM.0b013e31829610cc) PMID: [23917733](https://pubmed.ncbi.nlm.nih.gov/23917733/)
3. Casa DJ, Guskiewicz KM, Anderson SA, Courson RW, Heck JF, Jimenez CC, et al. National Athletic Trainers' Association Position Statement: Preventing sudden death in sports. *J Athl Train.* 2012; 47(1):96–118. PMID: [PMC3418121](https://pubmed.ncbi.nlm.nih.gov/PMC3418121/).
4. Australian Football League. 119th Annual Report 2015. Available at: [www.afl.com.au/afl-hq/annual-reports](http://www.afl.com.au/afl-hq/annual-reports), accessed 18 March 2016: 2015.
5. Australian Sports Commission. Sport for Community Development Available at [https://www.clearinghouseforsport.gov.au/knowledge\\_base/organised\\_sport/value\\_of\\_sport/sport\\_for\\_community\\_development](https://www.clearinghouseforsport.gov.au/knowledge_base/organised_sport/value_of_sport/sport_for_community_development) accessed 19 November 2015: Clearinghouse for Sport; 2015.
6. Finch CF. How useful are insurance claim data for sports injury prevention purposes? *Int J Inj Contr Saf Promot.* 2003; 10(3):181–3. doi: [10.1076/icsp.10.3.181.14559](https://doi.org/10.1076/icsp.10.3.181.14559)
7. Åman M, Forssblad M, Henriksson-Larsén K. Insurance claims data: a possible solution for a national sports injury surveillance system? An evaluation of data information against ASIDD and consensus statements on sports injury surveillance. *BMJ Open.* 2014; 4(6):e005056. doi: [10.1136/bmjopen-2014-005056](https://doi.org/10.1136/bmjopen-2014-005056) PMID: [24928588](https://pubmed.ncbi.nlm.nih.gov/24928588/)
8. JLT Sport. Australian Football National Risk Protection Programme Available at: <https://afl.jltsport.com.au/community.aspx> accessed 19 November 2015: JLT Sport; 2015.
9. Australian Football League. AFL Annual Reports. Available online from [www.afl.com.au/afl-hq/annual-reports](http://www.afl.com.au/afl-hq/annual-reports), last accessed 23/05/2016: 2016.
10. Boden BP, Breit I, Beachler JA, Williams A, Mueller FO. Fatalities in high school and college football players. *Am J Sports Med.* 2013; 41(5):1108–16. doi: [10.1177/0363546513478572](https://doi.org/10.1177/0363546513478572) PMID: [23477766](https://pubmed.ncbi.nlm.nih.gov/23477766/)
11. Holder Y, Peden M, Krug E, Lund J, Gururaj G, Kobusingye O. Injury Surveillance Guidelines. Geneva, Switzerland: World Health Organisation, 2001 Contract No.: Report.
12. Chappex N, Schlaepfer J, Fellmann F, Bhuiyan ZA, Wilhelm M, Michaud K. Sudden cardiac death among general population and sport related population in forensic experience. *J Forensic Leg Med.* 2015; 35:62–8. doi: <http://dx.doi.org/10.1016/j.jflm.2015.07.004> PMID: [26344462](https://pubmed.ncbi.nlm.nih.gov/26344462/)
13. Harmon KG, Asif IM, Klossner D, Drezner JA. Incidence of sudden cardiac death in national collegiate athletic association athletes. *Circulation.* 2011; 123(15):1594–600. doi: [10.1161/circulationaha.110.004622](https://doi.org/10.1161/circulationaha.110.004622) PMID: [21464047](https://pubmed.ncbi.nlm.nih.gov/21464047/)
14. McCrory PR, Berkovic SF, Cordner SM. Deaths due to brain injury among footballers in Victoria, 1968–1999. *Med J Aust.* 2000; 172(5):217–9. PMID: [10776393](https://pubmed.ncbi.nlm.nih.gov/10776393/)
15. Young MC, Fricker PA, Thomson NJ, Lee K. Sudden death due to ischaemic heart disease in young aboriginal sportsmen in the Northern Territory, 1982–1996. *Med J Aust.* 1999; 170(9):425–8. PMID: [10341774](https://pubmed.ncbi.nlm.nih.gov/10341774/)
16. Parsons S, Lynch M. Sudden cardiac death whilst playing Australian rules football: A retrospective 14 year review. *Forensic Sci Med Pathol.* 48:S93. doi: [10.1016/j.pathol.2015.12.261](https://doi.org/10.1016/j.pathol.2015.12.261)
17. Maron BJ, Shirani J, Poliac LC, Mathenge R, Roberts WC, Mueller FO. Sudden death in young competitive athletes. *JAMA—J Am Med Assoc.* 1996; 276:199–204.
18. Corrado D, Basso C, Schiavon M, Pelliccia A, Thiene G. Pre-participation screening of young competitive athletes for prevention of sudden cardiac death. *J Am Coll Cardiol.* 2008; 52(24):1981–9. doi: [10.1016/j.jacc.2008.06.053](https://doi.org/10.1016/j.jacc.2008.06.053) PMID: [19055989](https://pubmed.ncbi.nlm.nih.gov/19055989/)
19. Maron BJ, Thompson PD, Ackerman MJ, Balady G, Berger S, Cohen D, et al. Recommendations and considerations related to preparticipation screening for cardiovascular abnormalities in competitive

- athletes: 2007 update: a scientific statement from the American Heart Association Council on Nutrition, Physical Activity, and Metabolism: endorsed by the American College of Cardiology Foundation. *Circulation*. 2007; 115(12):1643–55. PMID: [17353433](#)
20. Drezner JA. Contemporary approaches to the identification of athletes at risk for sudden cardiac death. *Curr Opin Cardiol*. 2008; 23(5):494–501. doi: [10.1097/HCO.0b013e32830b3624](#) PMID: [18670262](#)
  21. Drezner JA, Rao AL, Heistand J, Bloomingdale MK, Harmon KG. Effectiveness of emergency response planning for sudden cardiac arrest in united states high schools with automated external defibrillators. *Circulation*. 2009; 120(6):518–25. doi: [10.1161/circulationaha.109.855890](#) PMID: [19635968](#)
  22. Corrado D, Schimied C, Basso C, Borjesson M, Schiavon M, Pelliccia A, et al. Risk of sports: do we need a pre-participation screening for competitive and leisure athletes? *Eur Heart J*. 2011; 32(8):934–44. doi: [10.1093/eurheartj/ehq482](#) PMID: [21278396](#)
  23. Papadakis M, Sharma S, Cox S, Sheppard MN, Panoulas VF, Behr ER. The magnitude of sudden cardiac death in the young: a death certificate-based review in England and Wales. *Europace*. 2009; 11(10):1353–8. doi: [10.1093/europace/eup229](#) PMID: [19700472](#)
  24. Link MS, Estes NAM. Sudden cardiac death in the athlete: bridging the gaps between evidence, policy, and practice. *Circulation*. 2012; 125(20):2511–6. doi: [10.1161/circulationaha.111.023861](#) PMID: [22615422](#)
  25. Australian Sports Commission. Sudden cardiac death in sport Available at: [https://www.clearinghouseforsport.gov.au/knowledge\\_base/sport\\_participation/sport\\_injuries\\_and\\_medical\\_conditions/sudden\\_cardiac\\_death\\_in\\_sport](https://www.clearinghouseforsport.gov.au/knowledge_base/sport_participation/sport_injuries_and_medical_conditions/sudden_cardiac_death_in_sport) accessed 29 February 2016.2016.
  26. Sweeting J, Ingles J, Ball K, Semsarian C. Sudden deaths during the largest community running event in Australia: A 25-year review. *Int J Cardiol*. 2016; 203:1029–31. doi: <http://dx.doi.org/10.1016/j.ijcard.2015.11.103> PMID: [26630631](#)
  27. Harmon KG, Asif IM, Maleszewski JJ, Owens DS, Prutkin JM, Salerno JC, et al. Incidence, cause, and comparative frequency of sudden cardiac death in national collegiate athletic association athletes: a decade in review. *Circulation*. 2015; 132(1):10–9. doi: [10.1161/circulationaha.115.015431](#) PMID: [25977310](#)
  28. Sports Medicine Australia. Medical emergency planning—a practical guide for community clubs. Available at [http://sma.org.au/wp-content/uploads/2015/12/MedicalEmergencyPlanningGuide\\_web.pdf](http://sma.org.au/wp-content/uploads/2015/12/MedicalEmergencyPlanningGuide_web.pdf) accessed 17 March 2016: 2015.
  29. Victorian State Government HaHS. Defibrillators for sporting clubs and facilities program Available at: <http://sport.vic.gov.au/grants-and-programs/defibrillators-for-sporting-clubs-and-facilities-program> accessed 17 March 2016.2016.
  30. AIHW: Kreisfeld R, Harrison JE, Pointer S. Australian sports injury hospitalisations 2011–12. Injury research and statistics series no. 92. Cat. no. INJCAT 168. Canberra: AIHW. 2014. Available at: <http://www.aihw.gov.au/publication-detail/?id=60129549100> accessed 13 March 2016.
  31. Andrew NE, Gabbe BJ, Wolfe R, Cameron PA. Trends in sport and active recreation injuries resulting in major trauma or death in adults in Victoria, Australia, 2001–2007. *Injury*. 2012; 43(9):1527–33. doi: <http://dx.doi.org/10.1016/j.injury.2011.01.031> PMID: [21345432](#)
  32. Gabbe BJ, Finch CF, Cameron PA, Williamson OD. Incidence of serious injury and death during sport and recreation activities in Victoria, Australia. *Br J Sports Med*. 2005; 39:573–7. PMID: [16046347](#)
  33. Finch CF, Boufous S. Do inadequacies in ICD-10-AM activity coded data lead to underestimates of the population frequency of sports/leisure injuries? *Inj Prev*. 2008; 14(3):202–4. doi: [10.1136/ip.2007.017251](#) PMID: [18523115](#)
  34. Langley J, Simpson J. Injury surveillance: unrealistic expectations of safe communities. *Inj Prev*. 2009; 15(3):146–9. doi: [10.1136/ip.2008.020974](#) PMID: [19494092](#)
  35. Soo IH, Lam MK, Rust J, Madden R. Do we have enough information? How ICD-10-AM activity codes measure up. *HIM J*. 2009; 38(1):22–34. PMID: [19293433](#)
  36. Taioli E. All causes mortality in male professional soccer players. *Eur J Pub Health*. 2007; 17(6):600–4. doi: [10.1093/eurpub/ckm035](#)
  37. AIHW: Henley G & Harrison JE. Trends in injury deaths, Australia: 1999–00 to 2009–10. Injury research and statistics series no. 74. Cat. no. INJCAT 150. Canberra: AIHW. 2015. Available at: <http://www.aihw.gov.au/publication-detail/?id=60129550960> accessed 12 March 2016.
  38. Australian Football League. 118th Annual Report 2014. Available online from [www.afl.com.au/afl-hq/annual-reports](http://www.afl.com.au/afl-hq/annual-reports), last accessed 11/11/2015: 2014.
